# Supplementary material for: Revealing the tissue-level complexity of endogenous glucagon-like peptide-1 receptor expression and signaling
Source: Nat Commun. 2023 Jan 18;14:301. doi: 10.1038/s41467-022-35716-1 (PMC9849236; doi:10.1038/s41467-022-35716-1)
Supplement: Supplementary file 1 — Supplementary Information [file 41467_2022_35716_MOESM1_ESM.pdf]

## SUPPLEMENTARY INFORMATION

### Revealing the tissue-level complexity of endogenous glucagon-like peptide-1 receptor expression and signaling

Julia Ast<sup>1</sup>, Daniela Nasteska<sup>1</sup>, Nicholas H.F. Fine<sup>1</sup>, Daniel J. Nieves<sup>2</sup>, Zsombor Koszegi<sup>1</sup>, Yann Lanoiselée<sup>1</sup>, Federica Cuozzo<sup>1</sup>, Katrina Vilorio<sup>1</sup>, Andrea Bacon<sup>3</sup>, Nguyet T. Luu<sup>4,5</sup>, Philip N. Newsome<sup>4,5</sup>, Davide Calebiro<sup>1</sup>, Dylan M. Owen<sup>2</sup>, Johannes Broichhagen<sup>6\*</sup> and David J. Hodson<sup>1,7\*</sup>

<sup>1</sup> Institute of Metabolism and Systems Research (IMSR), and Centre of Membrane Proteins and Receptors (COMPARE), University of Birmingham, Birmingham, UK.

<sup>2</sup> Institute for Immunology and Immunotherapy, and Centre of Membrane Proteins and Receptors (COMPARE), University of Birmingham, Birmingham, UK.

<sup>3</sup> Genome Editing Facility, Technology Hub, University of Birmingham, Birmingham, UK

<sup>4</sup> National Institute for Health Research Biomedical Research Centre at University Hospitals Birmingham NHS Foundation Trust, University of Birmingham, Birmingham, United Kingdom.

<sup>5</sup> Centre for Liver and Gastrointestinal Research, Institute of Immunology and Immunotherapy, University of Birmingham, Birmingham, United Kingdom.

<sup>6</sup> Leibniz-Forschungsinstitut für Molekulare Pharmakologie, Berlin, Germany.

<sup>7</sup> Oxford Centre for Diabetes, Endocrinology and Metabolism (OCDEM), NIHR Oxford Biomedical Research Centre, Churchill Hospital, Radcliffe Department of Medicine, University of Oxford, Oxford, OX3 7LE, UK.

\*Correspondence should be addressed to:

[david.hodson@ocdem.ox.ac.uk](mailto:david.hodson@ocdem.ox.ac.uk), [broichhagen@fmp-berlin.de](mailto:broichhagen@fmp-berlin.de)

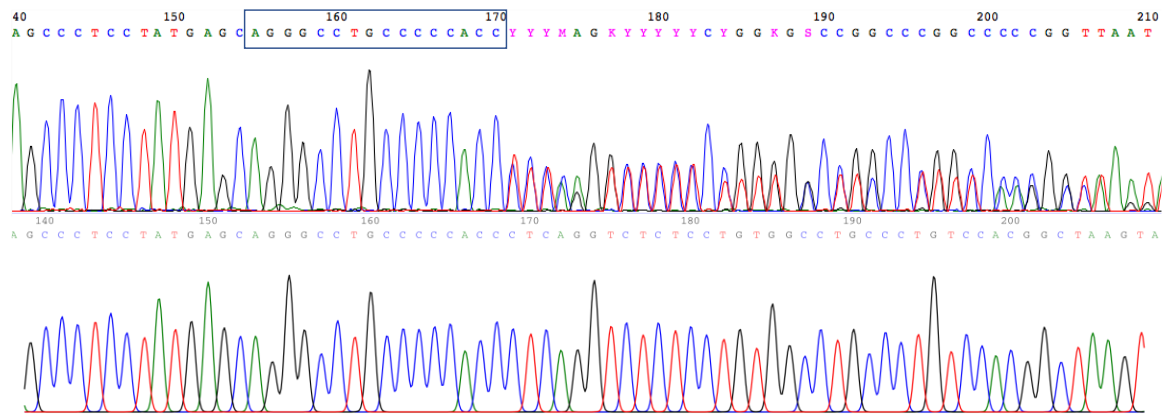

**Supplementary Figure 1: Sequencing reveals mutation in potential off-target site in founder.** The region around the predicted off-target site within an intron of gene NM\_030721 was amplified via PCR using the primers 5'-CTCTGACCCGTGTGTTACCT-3' and 5'-GCATGGATACCACTCCCACC-3' and analyzed via Sanger sequencing. The guide sequence is partly highlighted in the box and indels were introduced close to the Cas9 cut site in the founder mouse (top). Only offspring without the mutation (bottom) were taken forward for breeding.

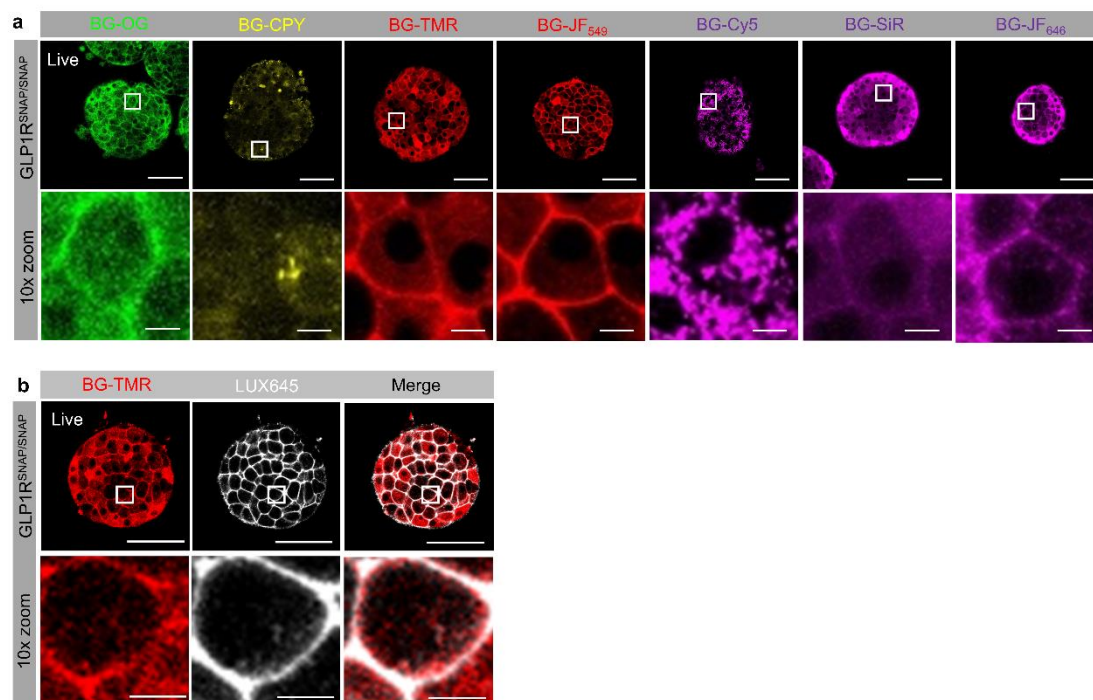

**Supplementary Figure 2: SNAP labeling in intact and dissociated GLP1R<sup>SNAP/SNAP</sup> islets.** a) Magnifications of Figure 2b showing single cell GLP1R<sup>SNAP/SNAP</sup> labeling with BG-OG, BG-CPY, BG-TMR, BG-JF<sub>549</sub>, BG-Cy5, BG-SiR and BG-JF<sub>646</sub> (n = 16-42 islets, 3-7 animals) (scale bar = 85  $\mu$ m, except for zoom in scale bar = 8.5  $\mu$ m). b) Zoomed image from Figure 2e showing co-localization of BG-TMR and LUXendin645 (LUX645) labeling in single GLP1R<sup>SNAP/SNAP</sup> cells (n = 17 islets, 4 animals) (scale bar = 85  $\mu$ m for all images, except for zoom in scale bar = 8.5  $\mu$ m).

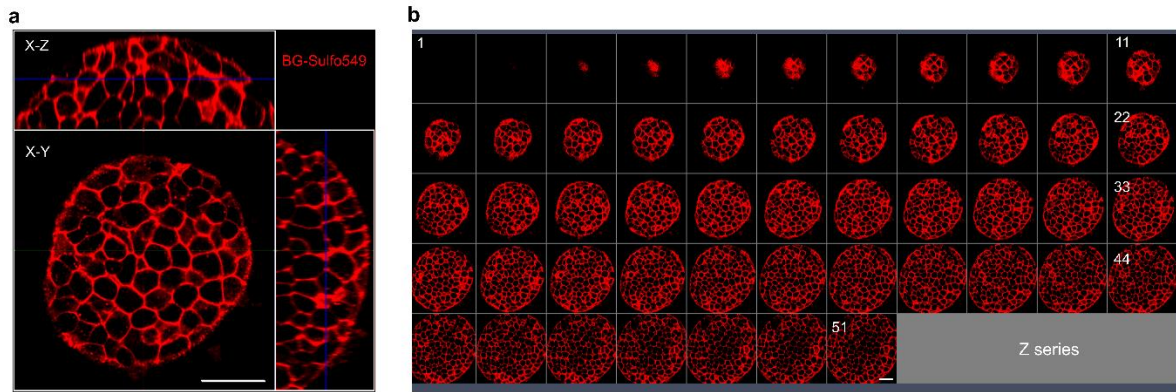

**Supplementary Figure 3: Fluorescent labelling is detected at depth within GLP1R<sup>SNAP/SNAP</sup> islets.** a and b) Confocal z-stack (a) and z-series (b) showing intense BG-Sulfo549 labelling within the 5<sup>th</sup> islet cell layer located at 50  $\mu$ m depth within the islet (n = 24 islets, 11 animals) (Scale bar = 34  $\mu$ m).

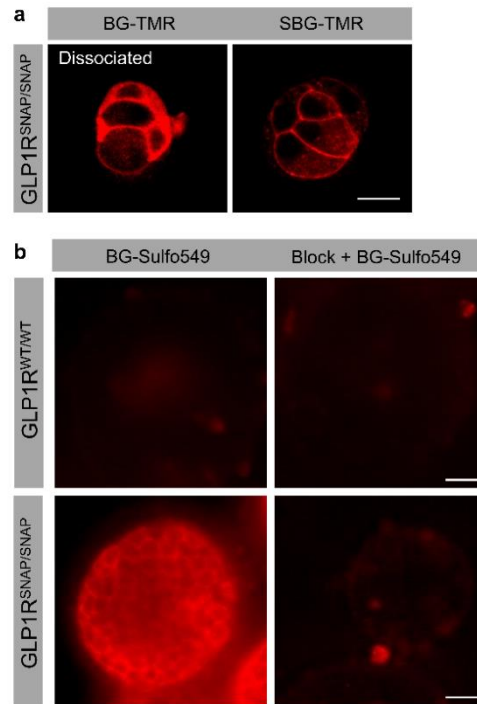

**Supplementary Figure 4: Tissue-dependency and specificity of sulfonated SNAP labels.** a) Sulfonation of BG-TMR to produce SBG-TMR leads to membrane-restricted GLP1R<sup>SNAP/ SNAP</sup> labelling in dissociated beta cells (~150 islets per animal, n = 4 animals) (scale bar = 11  $\mu$ m). b) BG-Sulfo549 labelling can be blocked by prior application of BG-Block in GLP1R<sup>SNAP/ SNAP</sup> islets (n = 25-33 islets, 5 animals) (scale bar = 30  $\mu$ m).

73 **Supplementary Table 1:** Selected predicted off-targets for guide sequence  
74 AGGGCCGGCCCCCGCCCUC.  
75

| Sequence                                              | Mismatches      | UCSC gene    | Locus           |
|-------------------------------------------------------|-----------------|--------------|-----------------|
| AGGGCC <u>CG</u> CCCCCGCCCTCCAG                       | 2MMs [7:9]      |              | chr9:-114887514 |
| AGGGCC <u>T</u> CCCCC <u>A</u> CCCTCAGG               | 2MMs [7:14]     | NM_030721    | chr5:-35931971  |
| AGGGC <u>A</u> CGCCCCCGCCCTCTGG                       | 3MMs [6:7:9]    | NM_001081023 | chr1:-138015670 |
| <u>G</u> GGTGC GGCCCCCGCCCTCAGG                       | 3MMs [1:4:5]    | NM_011599    | chr4:+71861176  |
| <u>A</u> <u>C</u> <u>T</u> <u>C</u> CCCTGCCCGCCCTCTAG | 4MMs [2:3:4:7]  |              | chr4:+53051322  |
| AGCGCC <u>A</u> GGCCCCCGCCCTCTGG                      | 3MMs [3:7:9]    | NM_144784    | chr9:-53418526  |
| <u>G</u> AGGGCCGGCCCCCGCCCTCTGG                       | 3MMs [1:2:9]    |              | chr5:+113593900 |
| <u>G</u> CCGCCGGT <u>T</u> CCCCGCCCTCGGG              | 4MMs [1:2:3:9]  | NM_028194    | chr5:+73647675  |
| AGGGCC <u>A</u> G <u>A</u> CCCCGCCCACTGG              | 3MMs [7:9:18]   | NM_029834    | chr7:+4434126   |
| <u>G</u> GGCC <u>C</u> CGC <u>A</u> CCCGCCCTCCGG      | 4MMs [1:4:7:10] | NM_029688    | chr2:-151931498 |

76
